# Supplementary material for: Case fatality of agricultural pesticides after self-poisoning in Sri Lanka: a prospective cohort study
Source: PubMed Central journal article supplement (PMC8131203; doi:10.1016/s2214-109x(21)00086-3), 2021-04-23
Supplement: mmc3.pdf [file mmc3.pdf]

# THE LANCET

## Global Health

### Supplementary appendix 3

This appendix formed part of the original submission and has been peer reviewed.  
We post it as supplied by the authors.

Supplement to: Buckley NA, Fahim M, Raubenheimer J, et al. Case fatality of agricultural pesticides after self-poisoning in Sri Lanka: a prospective cohort study. *Lancet Glob Health* 2021; published online April 23. [http://dx.doi.org/10.1016/S2214-109X\(21\)00086-3](http://dx.doi.org/10.1016/S2214-109X(21)00086-3).

Supplementary Tables 1 to 5 for Buckley NA et al. **Case fatality of agricultural pesticides after self-poisoning in Sri Lanka: a prospective cohort study. Lancet Global Health 2021.**

Supplementary Table 1 – Dates of initiation of phased in partial restrictions and subsequent importation bans and legislative restrictions on pesticides in Sri Lanka.

| <b>Pesticide</b>          | <b>Partial restriction/<br/>Phase out period starts</b> | <b>Effective<br/>Restrictions</b> | <b>Legislative<br/>ban</b> |
|---------------------------|---------------------------------------------------------|-----------------------------------|----------------------------|
| Most POPs                 |                                                         | 1970-95                           | 2001                       |
| <b>Class I pesticides</b> |                                                         | 1984-95                           | 2001                       |
| <b>Endosulfan</b>         |                                                         | 1998                              | 2001                       |
| <b>Paraquat</b>           | 2008                                                    | 2012                              | 2014                       |
| <b>Dimethoate</b>         | 2008                                                    | 2011                              | 2014                       |
| <b>Fenthion</b>           | 2008                                                    | 2011                              | 2014                       |
| Cyromazine                | ?                                                       | 2011                              | 2014                       |
| Alachlor                  | ?                                                       | 2012                              | 2014                       |
| Glyphosate                | 2014 †                                                  | 2015                              | * 2015                     |
| Carbofuran                | 2013                                                    | 2015                              | 2016                       |
| Carbaryl                  | 2013                                                    | 2015                              | 2016                       |
| Chlorpyrifos              | 2013                                                    | 2015                              | 2016                       |
| Propanil                  | 2014 †                                                  |                                   | -                          |

\* In 2018 reregistered with tight restrictions

† Regional restriction

Bolded agents restricted to reduce risks from acute poisoning, other restrictions for environmental or chronic toxicity.

Internet sources <sup>11,21</sup>: <https://www.doa.gov.lk/SCPPC/images/ROP/Tabel.pdf>

<https://www.parliament.lk/uploads/documents/paperspresented/performance-report-department-of-agriculture-2015.pdf>

Supplementary Table 2. Characteristics of cohort, overall and in three different time periods.

|                                         | Overall |                          | 2002-2006 |                          | 2007-2012 |                          | 2013-2019 |                          |
|-----------------------------------------|---------|--------------------------|-----------|--------------------------|-----------|--------------------------|-----------|--------------------------|
|                                         | N       | Median (IQR)<br>or N (%) | N         | Median (IQR)<br>or N (%) | N         | Median (IQR) or<br>N (%) | N         | Median (IQR) or<br>N (%) |
| <b>N transferred</b>                    | 34,902  | 23,245 (66.6%)           | 7,741     | 5230 (67.6%)             | 15,958    | 10,900 (68.3%)           | 11,203    | 7,115 (63.5%)            |
| <b>Deaths</b>                           | 34,902  | 2,299 (6.6%)             | 7,741     | 815 (10.5%)              | 15,958    | 1,073 (6.7%)             | 11,203    | 411 (3.67%)              |
| <b>Sex</b>                              | 34,900  |                          | 7,741     |                          | 15,956    |                          | 11,203    |                          |
| <b>Female</b>                           |         | 11,840 (33.9%)           |           | 2,532 (32.7%)            |           | 5,604 (35.1%)            |           | 3,704 (33.1%)            |
| <b>Male</b>                             |         | 23,060 (66.1%)           |           | 5,209 (67.3%)            |           | 10,352 (64.9%)           |           | 7,499 (66.9%)            |
| <b>Age</b>                              | 34,898  | 29 (21 - 40)             | 7,741     | 28 (21 - 39)             | 15,955    | 28 (21 - 40)             | 11,202    | 30 (22 - 43)             |
| <b>Time post ingestion<br/>(mins) *</b> | 32,114  | 225 (130 - 405)          | 7,527     | 261 (171 - 422)          | 14,456    | 262 (150 - 520)          | 10,131    | 160 (90 - 260)           |
| <b>Ingested multiple<br/>pesticides</b> | 34,902  | 455 (1.3%)               | 7,741     | 166 (2.1%)               | 15,958    | 206 (1.3%)               | 11,203    | 83 (0.7%)                |
| <b>Cohort ingestions</b>                | 35,628  |                          | 7,999     |                          | 16,221    |                          | 11,408    |                          |
| <b>Known pesticides</b>                 |         | 23,139 (64.9%)           |           | 6,158 (77.0%)            |           | 10,700 (66.0%)           |           | 6,281 (55.1%)            |
| <b>'Unknown pesticides'</b>             |         | 6,643 (18.6%)            |           | 1,198 (15.0%)            |           | 2,838 (17.5%)            |           | 2,607 (22.9%)            |
| <b>'Unknown substances'</b>             |         | 5,846 (16.4%)            |           | 643 (8.0%)               |           | 2,683 (16.5%)            |           | 2,520 (22.1%)            |

\* Taken from time of first recorded examination in 48% of cases where admission time was not recorded.

**Supplementary Table 3** Case fatality of all pesticides and unknown substances ordered by class and then case numbers as identified in the SACTRC database

| Class                               | Substance         | N of Patients | Fatal | Case fatality | 95%CI          |
|-------------------------------------|-------------------|---------------|-------|---------------|----------------|
| <b>Organophosphorus insecticide</b> |                   | 10612         | 927   | 8.7%          |                |
|                                     | Chlorpyrifos      | 3340          | 213   | 6.4%          | (5.6 to 7.3)   |
|                                     | Unknown OP        | 2637          | 234   | 8.9%          | (7.8 to 10)    |
|                                     | Dimethoate        | 1190          | 229   | 19.2%         | (17 to 21.6)   |
|                                     | Profenofos        | 1161          | 84    | 7.2%          | (5.8 to 8.9)   |
|                                     | Malathion         | 482           | 12    | 2.5%          | (1.3 to 4.3)   |
|                                     | Diazinon          | 448           | 27    | 6.0%          | (4 to 8.6)     |
|                                     | Fenthion          | 388           | 56    | 14.4%         | (11.1 to 18.3) |
|                                     | Phenthoate        | 366           | 25    | 6.8%          | (4.5 to 9.9)   |
|                                     | Quinalphos        | 303           | 26    | 8.6%          | (5.7 to 12.3)  |
|                                     | Acephate          | 51            | 1     | 2.0%          | (0 to 10.4)    |
|                                     | Coumaphos         | 35            | 0     | 0.0%          | (0 to 10)      |
|                                     | Methamidophos     | 35            | 3     | 8.6%          | (1.8 to 23.1)  |
|                                     | Monocrotophos     | 29            | 1     | 3.4%          | (0.1 to 17.8)  |
|                                     | Azamethiphos      | 25            | 0     | 0.0%          | (0 to 13.7)    |
|                                     | Prothiofos        | 22            | 3     | 13.6%         | (2.9 to 34.9)  |
|                                     | Pirimiphos-Methyl | 20            | 0     | 0.0%          | (0 to 16.8)    |
|                                     | Phoxim            | 14            | 1     | 7.1%          | (0.2 to 33.9)  |
|                                     | Azinphos Methyl   | 12            | 1     | 8.3%          | (0.2 to 38.5)  |
|                                     | Oxydemeton-Methyl | 8             | 1     | 12.5%         | (0.3 to 52.7)  |
|                                     | Dichlorvos        | 7             | 0     | 0.0%          | (0 to 41)      |
|                                     | Parathion Methyl  | 7             | 5     | 71.4%         | (29 to 96.3)   |
|                                     | Triazophos        | 5             | 0     | 0.0%          | (0 to 52.2)    |
|                                     | Parathion         | 4             | 1     | 25.0%         | (0.6 to 80.6)  |
|                                     | Carbophenothion   | 3             | 0     | 0.0%          | (0 to 70.8)    |
|                                     | Chlorfenvinphos   | 3             | 0     | 0.0%          | (0 to 70.8)    |
|                                     | Formothion        | 3             | 1     | 33.3%         | (0.8 to 90.6)  |
|                                     | Bromophos Ethyl   | 2             | 1     | 50.0%         | (1.3 to 98.7)  |
|                                     | Fenitrothion      | 2             | 0     | 0.0%          | (0 to 84.2)    |
|                                     | Phosphate         | 2             | 0     | 0.0%          | (0 to 84.2)    |
|                                     | Ethion            | 1             | 1     | 100.0%        | (2.5 to 100)   |
|                                     | Etrimfos          | 1             | 0     | 0.0%          | (0 to 97.5)    |
|                                     | Isofenphos        | 1             | 1     | 100.0%        | (2.5 to 100)   |
|                                     | Phosalone         | 1             | 0     | 0.0%          | (0 to 97.5)    |
|                                     | Temephos          | 1             | 0     | 0.0%          | (0 to 97.5)    |
|                                     | Tetrachlorvinphos | 1             | 0     | 0.0%          | (0 to 97.5)    |

|                           |             |            |             |               |
|---------------------------|-------------|------------|-------------|---------------|
| Trichlorfon               | 1           | 0          | 0.0%        | (0 to 97.5)   |
| Phosphorothioate          | 1           | 0          | 0.0%        | (0 to 97.5)   |
| <b>Carbamates</b>         | <b>3440</b> | <b>165</b> | <b>4.8%</b> |               |
| Carbofuran                | 1740        | 37         | 2.1%        | (1.5 to 2.9)  |
| Carbosulfan               | 1129        | 86         | 7.6%        | (6.1 to 9.3)  |
| Fenobucarb (BPMC)         | 315         | 27         | 8.6%        | (5.7 to 12.2) |
| Unknown Carbamate         | 125         | 11         | 8.8%        | (4.5 to 15.2) |
| Propoxur                  | 68          | 1          | 1.5%        | (0 to 7.9)    |
| Carbaryl                  | 30          | 2          | 6.7%        | (0.8 to 22.1) |
| Methomyl                  | 26          | 1          | 3.8%        | (0.1 to 19.6) |
| Diazyldiazine             | 4           | 0          | 0.0%        | (0 to 60.2)   |
| Dimethylcarbamate         | 1           | 0          | 0.0%        | (0 to 97.5)   |
| Isoprocarb                | 1           | 0          | 0.0%        | (0 to 97.5)   |
| Mexacarbate               | 1           | 0          | 0.0%        | (0 to 97.5)   |
| <b>Pyrethroids</b>        | <b>1046</b> | <b>5</b>   | <b>0.5%</b> |               |
| Etofenprox                | 482         | 4          | 0.8%        | (0.2 to 2.1)  |
| Unknown Pyrethroid        | 260         | 0          | 0.0%        | (0 to 1.4)    |
| Allethrin                 | 85          | 0          | 0.0%        | (0 to 4.2)    |
| Flumethrin                | 51          | 0          | 0.0%        | (0 to 7)      |
| Cypermethrin              | 42          | 0          | 0.0%        | (0 to 8.4)    |
| Deltamethrin              | 32          | 0          | 0.0%        | (0 to 10.9)   |
| Lambda-Cyhalothrin        | 16          | 0          | 0.0%        | (0 to 20.6)   |
| Imiprothrin               | 14          | 0          | 0.0%        | (0 to 23.2)   |
| Cyfluthrin                | 12          | 0          | 0.0%        | (0 to 26.5)   |
| Fenvalerate               | 11          | 1          | 9.1%        | (0.2 to 41.3) |
| Transfluthrin             | 9           | 0          | 0.0%        | (0 to 33.6)   |
| Esfenvalerate             | 7           | 0          | 0.0%        | (0 to 41)     |
| Cyhalothrin               | 4           | 0          | 0.0%        | (0 to 60.2)   |
| Phenothrin                | 4           | 0          | 0.0%        | (0 to 60.2)   |
| Pallethrin                | 4           | 0          | 0.0%        | (0 to 60.2)   |
| Pyrethrum                 | 4           | 0          | 0.0%        | (0 to 60.2)   |
| Pybutrin                  | 2           | 0          | 0.0%        | (0 to 84.2)   |
| Resmethrin                | 2           | 0          | 0.0%        | (0 to 84.2)   |
| Tetramethrin/Cyphenothrin | 2           | 0          | 0.0%        | (0 to 84.2)   |
| Cypermethrin/Imiprothrin  | 1           | 0          | 0.0%        | (0 to 97.5)   |
| Cyphenothrin              | 1           | 0          | 0.0%        | (0 to 97.5)   |
| Phenothrine               | 1           | 0          | 0.0%        | (0 to 97.5)   |
| <b>Other Insecticides</b> | <b>1008</b> | <b>20</b>  | <b>2.0%</b> |               |
| Abamectin                 | 254         | 4          | 1.6%        | (0.4 to 4)    |
| Imidacloprid              | 218         | 8          | 3.7%        | (1.6 to 7.1)  |
| Fipronil                  | 122         | 0          | 0.0%        | (0 to 3)      |
| Chlorfluazuron            | 110         | 2          | 1.8%        | (0.2 to 6.4)  |
| Thiamethoxam              | 56          | 1          | 1.8%        | (0 to 9.6)    |

|                                 |             |            |              |               |
|---------------------------------|-------------|------------|--------------|---------------|
| Acetamiprid                     | 42          | 0          | 0.0%         | (0 to 8.4)    |
| Tebufenozide                    | 29          | 1          | 3.4%         | (0.1 to 17.8) |
| Unknown Neonicotinoid           | 18          | 0          | 0.0%         | (0 to 18.5)   |
| Chlorantraniliprole             | 17          | 1          | 5.9%         | (0.1 to 28.7) |
| Endosulfan                      | 15          | 3          | 20.0%        | (4.3 to 48.1) |
| Benzoylurea                     | 14          | 0          | 0.0%         | (0 to 23.2)   |
| Azadirachtin                    | 11          | 0          | 0.0%         | (0 to 28.5)   |
| Spinosad                        | 10          | 0          | 0.0%         | (0 to 30.8)   |
| Novaluron                       | 8           | 0          | 0.0%         | (0 to 36.9)   |
| Chromafenozide                  | 7           | 0          | 0.0%         | (0 to 41)     |
| Mortein                         | 7           | 0          | 0.0%         | (0 to 41)     |
| Amitraz                         | 5           | 0          | 0.0%         | (0 to 52.2)   |
| Indoxacarb                      | 5           | 0          | 0.0%         | (0 to 52.2)   |
| Methoxyfenozide                 | 5           | 0          | 0.0%         | (0 to 52.2)   |
| Phenylpyrazole                  | 5           | 0          | 0.0%         | (0 to 52.2)   |
| Emamectin Benzoate              | 4           | 0          | 0.0%         | (0 to 60.2)   |
| Flubendiamide                   | 4           | 0          | 0.0%         | (0 to 60.2)   |
| Thiacloprid                     | 4           | 0          | 0.0%         | (0 to 60.2)   |
| Insecticide Chalk               | 3           | 0          | 0.0%         | (0 to 70.8)   |
| Mosquito Coil                   | 3           | 0          | 0.0%         | (0 to 70.8)   |
| Thiocyclam Hydrogen Oxalate     | 3           | 0          | 0.0%         | (0 to 70.8)   |
| Unknown Organochlorine          | 3           | 0          | 0.0%         | (0 to 70.8)   |
| Ant Poison                      | 2           | 0          | 0.0%         | (0 to 84.2)   |
| Chloronicotinyl                 | 2           | 0          | 0.0%         | (0 to 84.2)   |
| Cyromazine                      | 2           | 0          | 0.0%         | (0 to 84.2)   |
| Insect Growth Regulator         | 2           | 0          | 0.0%         | (0 to 84.2)   |
| Lufenuron                       | 2           | 0          | 0.0%         | (0 to 84.2)   |
| Tick Poison                     | 2           | 0          | 0.0%         | (0 to 84.2)   |
| Aluminium Phosphide             | 1           | 0          | 0.0%         | (0 to 97.5)   |
| Ant Killer                      | 1           | 0          | 0.0%         | (0 to 97.5)   |
| Arsenic                         | 1           | 0          | 0.0%         | (0 to 97.5)   |
| Buprofezine                     | 1           | 0          | 0.0%         | (0 to 97.5)   |
| Carbavin                        | 1           | 0          | 0.0%         | (0 to 97.5)   |
| Clofentezine                    | 1           | 0          | 0.0%         | (0 to 97.5)   |
| Flufenoxuron                    | 1           | 0          | 0.0%         | (0 to 97.5)   |
| Methylene Blue                  | 1           | 0          | 0.0%         | (0 to 97.5)   |
| Mosquito Repellant              | 1           | 0          | 0.0%         | (0 to 97.5)   |
| Paradichlorobenzene             | 1           | 0          | 0.0%         | (0 to 97.5)   |
| Rynaxypyr                       | 1           | 0          | 0.0%         | (0 to 97.5)   |
| Sulfluoramide                   | 1           | 0          | 0.0%         | (0 to 97.5)   |
| Unknown Insect Growth Regulator | 1           | 0          | 0.0%         | (0 to 97.5)   |
| Unknown Phenylpyrazole          | 1           | 0          | 0.0%         | (0 to 97.5)   |
| <b>Herbicides</b>               | <b>9054</b> | <b>904</b> | <b>10.0%</b> |               |

|                                 |      |     |       |                |
|---------------------------------|------|-----|-------|----------------|
| Glyphosate                      | 3908 | 93  | 2.4%  | (1.9 to 2.9)   |
| MCPA                            | 1646 | 88  | 5.3%  | (4.3 to 6.5)   |
| Paraquat                        | 1477 | 618 | 41.8% | (39.3 to 44.4) |
| Propanil                        | 982  | 81  | 8.2%  | (6.6 to 10.1)  |
| Bispyribac-Sodium               | 227  | 7   | 3.1%  | (1.2 to 6.3)   |
| Fenoxaprop-P-Ethyl              | 173  | 1   | 0.6%  | (0 to 3.2)     |
| Unknown Herbicide               | 139  | 2   | 1.4%  | (0.2 to 5.1)   |
| Pretilachlor                    | 119  | 2   | 1.7%  | (0.2 to 5.9)   |
| Pyribenzoxim                    | 59   | 1   | 1.7%  | (0 to 9.1)     |
| Glufosinate Ammonium            | 48   | 3   | 6.3%  | (1.3 to 17.2)  |
| Oxyfluorfen                     | 34   | 0   | 0.0%  | (0 to 10.3)    |
| Clomazone                       | 26   | 2   | 7.7%  | (0.9 to 25.1)  |
| Quinclorac                      | 24   | 3   | 12.5% | (2.7 to 32.4)  |
| Ethephon                        | 22   | 0   | 0.0%  | (0 to 15.4)    |
| Pendimethalin                   | 20   | 0   | 0.0%  | (0 to 16.8)    |
| Dithiocarbamate                 | 19   | 0   | 0.0%  | (0 to 17.6)    |
| Thiodicarb                      | 18   | 1   | 5.6%  | (0.1 to 27.3)  |
| Diuron                          | 14   | 0   | 0.0%  | (0 to 23.2)    |
| Alachlor                        | 13   | 1   | 7.7%  | (0.2 to 36)    |
| Benthiocarb                     | 11   | 0   | 0.0%  | (0 to 28.5)    |
| Azimsulfuron                    | 9    | 0   | 0.0%  | (0 to 33.6)    |
| Oxadiazon                       | 9    | 0   | 0.0%  | (0 to 33.6)    |
| Bensulfuron-Methyl              | 6    | 0   | 0.0%  | (0 to 45.9)    |
| Ethoxysulfuron                  | 6    | 0   | 0.0%  | (0 to 45.9)    |
| 1-Naphthaleneacetic Acid        | 5    | 0   | 0.0%  | (0 to 52.2)    |
| 2,4-Dichlorophenoxyacetic Acid  | 5    | 0   | 0.0%  | (0 to 52.2)    |
| Metribuzin                      | 5    | 0   | 0.0%  | (0 to 52.2)    |
| Chlorophenoxy                   | 4    | 1   | 25.0% | (0.6 to 80.6)  |
| Cyhalofop-Butyl Propionate      | 3    | 0   | 0.0%  | (0 to 70.8)    |
| Carfentrazone-Ethyl             | 2    | 0   | 0.0%  | (0 to 84.2)    |
| Nitrophenolate                  | 2    | 0   | 0.0%  | (0 to 84.2)    |
| Orthosulfamuron                 | 2    | 0   | 0.0%  | (0 to 84.2)    |
| Penoxsulam                      | 2    | 0   | 0.0%  | (0 to 84.2)    |
| Pyrazosulfuron-Ethyl            | 2    | 0   | 0.0%  | (0 to 84.2)    |
| Tiafenacil                      | 2    | 0   | 0.0%  | (0 to 84.2)    |
| 3,4-Dichloropropionanilide      | 1    | 0   | 0.0%  | (0 to 97.5)    |
| Bromoxynil                      | 1    | 0   | 0.0%  | (0 to 97.5)    |
| Chlorimuron Ethyl               | 1    | 0   | 0.0%  | (0 to 97.5)    |
| Chloroacetamide                 | 1    | 0   | 0.0%  | (0 to 97.5)    |
| Dichlorophenol                  | 1    | 0   | 0.0%  | (0 to 97.5)    |
| Metamifop                       | 1    | 0   | 0.0%  | (0 to 97.5)    |
| Methyl 3,4 Dichloro Carbanilate | 1    | 0   | 0.0%  | (0 to 97.5)    |
| Propachlor                      | 1    | 0   | 0.0%  | (0 to 97.5)    |

|                                           |            |           |             |               |
|-------------------------------------------|------------|-----------|-------------|---------------|
| Sethoxydim                                | 1          | 0         | 0.0%        | (0 to 97.5)   |
| Unknown Nitrophenyl Ether<br>Herbicide    | 1          | 0         | 0.0%        | (0 to 97.5)   |
| Unknown Phenol                            | 1          | 0         | 0.0%        | (0 to 97.5)   |
| <b>Fungicides</b>                         | <b>352</b> | <b>6</b>  | <b>1.7%</b> |               |
| Chlorothalonil                            | 65         | 0         | 0.0%        | (0 to 5.5)    |
| Mancozeb                                  | 36         | 0         | 0.0%        | (0 to 9.7)    |
| Propineb                                  | 32         | 0         | 0.0%        | (0 to 10.9)   |
| Tebuconazole                              | 32         | 0         | 0.0%        | (0 to 10.9)   |
| Hexaconazole                              | 28         | 1         | 3.6%        | (0.1 to 18.3) |
| Unknown Fungicide                         | 25         | 0         | 0.0%        | (0 to 13.7)   |
| Copper Oxide                              | 23         | 0         | 0.0%        | (0 to 14.8)   |
| Carbendazim                               | 19         | 0         | 0.0%        | (0 to 17.6)   |
| Edifenphos                                | 19         | 2         | 10.5%       | (1.3 to 33.1) |
| Thiram                                    | 9          | 1         | 11.1%       | (0.3 to 48.2) |
| Isoprothiolane                            | 8          | 0         | 0.0%        | (0 to 36.9)   |
| Antracol                                  | 7          | 0         | 0.0%        | (0 to 41)     |
| Copper Sulphate                           | 7          | 0         | 0.0%        | (0 to 41)     |
| Propiconazole                             | 7          | 0         | 0.0%        | (0 to 41)     |
| Pyraclostrobin                            | 4          | 1         | 25.0%       | (0.6 to 80.6) |
| Benzimidazole                             | 3          | 0         | 0.0%        | (0 to 70.8)   |
| Thiocarbamate                             | 3          | 0         | 0.0%        | (0 to 70.8)   |
| Thiophanate-Methyl                        | 3          | 0         | 0.0%        | (0 to 70.8)   |
| Captan                                    | 2          | 0         | 0.0%        | (0 to 84.2)   |
| Carboxin                                  | 2          | 0         | 0.0%        | (0 to 84.2)   |
| Coco Dimethyl Benzyl Ammonium<br>Chloride | 2          | 0         | 0.0%        | (0 to 84.2)   |
| Fluazinam                                 | 2          | 0         | 0.0%        | (0 to 84.2)   |
| Maneb                                     | 2          | 0         | 0.0%        | (0 to 84.2)   |
| Propamocarb                               | 2          | 1         | 50.0%       | (1.3 to 98.7) |
| Binapacryl                                | 1          | 0         | 0.0%        | (0 to 97.5)   |
| Bitertanol                                | 1          | 0         | 0.0%        | (0 to 97.5)   |
| Cosavet                                   | 1          | 0         | 0.0%        | (0 to 97.5)   |
| Difenoconazole                            | 1          | 0         | 0.0%        | (0 to 97.5)   |
| Ethylene Bis-Dithiocarbamate              | 1          | 0         | 0.0%        | (0 to 97.5)   |
| Hexachlorobenzene                         | 1          | 0         | 0.0%        | (0 to 97.5)   |
| Metiram                                   | 1          | 0         | 0.0%        | (0 to 97.5)   |
| Picoxystrobin                             | 1          | 0         | 0.0%        | (0 to 97.5)   |
| Pyrazophos                                | 1          | 0         | 0.0%        | (0 to 97.5)   |
| Thiocyanomethyl                           | 1          | 0         | 0.0%        | (0 to 97.5)   |
| <b>Rodenticides</b>                       | <b>859</b> | <b>12</b> | <b>1.4%</b> |               |
| Zinc Phosphide                            | 635        | 12        | 1.9%        | (1 to 3.3)    |
| Bromadiolone                              | 98         | 0         | 0.0%        | (0 to 3.7)    |



|                                |             |            |              |               |
|--------------------------------|-------------|------------|--------------|---------------|
| Coumarin                       | 39          | 0          | 0.0%         | (0 to 9)      |
| Brodifacoum                    | 36          | 0          | 0.0%         | (0 to 9.7)    |
| Unknown Rodenticide            | 29          | 0          | 0.0%         | (0 to 11.9)   |
| Ethanethiol                    | 10          | 0          | 0.0%         | (0 to 30.8)   |
| Coumatetralyl                  | 7           | 0          | 0.0%         | (0 to 41)     |
| Rat Poison                     | 2           | 0          | 0.0%         | (0 to 84.2)   |
| Thallium Sulfate               | 2           | 0          | 0.0%         | (0 to 84.2)   |
| Difenacoum                     | 1           | 0          | 0.0%         | (0 to 97.5)   |
| <b>Other Pesticides</b>        | <b>10</b>   | <b>1</b>   | <b>10.0%</b> |               |
| Metam Sodium                   | 4           | 1          | 25.0%        | (0.6 to 80.6) |
| Metaldehyde                    | 3           | 0          | 0.0%         | (0 to 70.8)   |
| Calcium Metaphosphate          | 1           | 0          | 0.0%         | (0 to 97.5)   |
| Nitroguaiacol                  | 1           | 0          | 0.0%         | (0 to 97.5)   |
| Unknown Aldehyde               | 1           | 0          | 0.0%         | (0 to 97.5)   |
| <b>'Unknown Pesticide'</b>     | <b>3402</b> | <b>157</b> | <b>4.6%</b>  |               |
| <b>Unidentified substances</b> | <b>5845</b> | <b>216</b> | <b>3.7%</b>  |               |

Supplementary Table 4. Effect of adjustment for age, sex, and year (with Multivariable logistic regression) on the relative odds of death with the nine most common pesticides

|                                | Unadjusted Odds Ratio (95% CI) |                 | Adjusted Odds Ratio (95% CI) |                  |
|--------------------------------|--------------------------------|-----------------|------------------------------|------------------|
| <b>Chlorpyrifos</b>            | [Ref]                          |                 | [Ref]                        |                  |
| <b>Carbofuran</b>              | 0.32                           | (0.22 to 0.45)  | 0.38                         | (0.26 to 0.54)   |
| <b>Carbosulfan</b>             | 1.21                           | (0.93 to 1.57)  | 1.85                         | (1.4 to 2.43)    |
| <b>Dimethoate</b>              | 3.50                           | (2.86 to 4.27)  | 3.30                         | (2.68 to 4.06)   |
| <b>Glyphosate</b>              | 0.36                           | (0.28 to 0.46)  | 0.55                         | (0.42 to 0.71)   |
| <b>MCPA</b>                    | 0.83                           | (0.64 to 1.07)  | 1.03                         | (0.79 to 1.34)   |
| <b>Paraquat</b>                | 10.56                          | (8.89 to 12.56) | 16.58                        | (13.71 to 20.06) |
| <b>Profenofos</b>              | 1.15                           | (0.88 to 1.49)  | 1.43                         | (1.08 to 1.89)   |
| <b>Propanil</b>                | 1.32                           | (1.01 to 1.72)  | 1.66                         | (1.26 to 2.19)   |
| <b>Unidentified substances</b> | 0.56                           | (0.46 to 0.68)  | 0.87                         | (0.71 to 1.07)   |
| <b>Unknown</b>                 | 1.43                           | (1.18 to 1.73)  | 1.72                         | (1.4 to 2.12)    |
| <b>Organophosphates</b>        |                                |                 |                              |                  |
| <b>Unknown Pesticides</b>      | 0.71                           | (0.57 to 0.88)  | 0.94                         | (0.75 to 1.17)   |
| <b>Female</b>                  |                                |                 | 0.68                         | (0.6 to 0.76)    |
| <b>Age (per year)</b>          |                                |                 | 1.06                         | (1.05 to 1.06)   |
| <b>Year</b>                    | 2002                           |                 | [Ref]                        |                  |
|                                | 2003                           |                 | 0.95                         | (0.7 to 1.3)     |
|                                | 2004                           |                 | 1.03                         | (0.78 to 1.36)   |
|                                | 2005                           |                 | 0.74                         | (0.55 to 0.98)   |
|                                | 2006                           |                 | 0.71                         | (0.53 to 0.94)   |
|                                | 2007                           |                 | 0.77                         | (0.59 to 1)      |
|                                | 2008                           |                 | 0.52                         | (0.39 to 0.68)   |
|                                | 2009                           |                 | 0.43                         | (0.32 to 0.59)   |
|                                | 2010                           |                 | 0.48                         | (0.36 to 0.65)   |
|                                | 2011                           |                 | 0.34                         | (0.25 to 0.46)   |
|                                | 2012                           |                 | 0.26                         | (0.19 to 0.35)   |
|                                | 2013                           |                 | 0.24                         | (0.18 to 0.33)   |
|                                | 2014                           |                 | 0.26                         | (0.18 to 0.36)   |
|                                | 2015                           |                 | 0.34                         | (0.24 to 0.47)   |
|                                | 2016                           |                 | 0.40                         | (0.28 to 0.57)   |
|                                | 2017                           |                 | 0.26                         | (0.16 to 0.43)   |
|                                | 2018                           |                 | 0.29                         | (0.15 to 0.55)   |
|                                | 2019                           |                 | 0.33                         | (0.15 to 0.74)   |

**Supplementary Table 5. Logistic regression of risk of death in the cohort comparing the effects of bans versus other factors changing over time.**

**Note: The percentage of patients with a known pesticide ingestion taking paraquat, dimethoate or fenthion that year is the first factor – and is equivalent to a halving of the risk of death for every 13% reduction in the proportion of pesticide poisonings taking these three highly toxic agents.**

| <b>Variable</b>                             |                 | <b>Adjusted Odds Ratio (95% CI)</b> |                  |
|---------------------------------------------|-----------------|-------------------------------------|------------------|
| <b>Paraquat/Dimethoate/Fenthion (per %)</b> |                 | 1.055                               | (1.053 to 1.057) |
| <b>Age (per year)</b>                       |                 | 1.060                               | (1.056 to 1.063) |
| <b>Female</b>                               |                 | 0.608                               | (0.534 to 0.692) |
| <b>Site</b>                                 | Anuradhapura    | [Ref]                               |                  |
|                                             | Galle           | 0.961                               | (0.791 to 1.169) |
|                                             | Kurunegala      | 1.393                               | (1.152 to 1.684) |
|                                             | Peradeniya      | 1.156                               | (0.968 to 1.382) |
|                                             | Polonnaruwa     | 1.362                               | (1.174 to 1.581) |
|                                             | Smaller Centres | 1.2                                 | (0.995 to 1.448) |
| <b>Study Year</b>                           | 2002            | [Ref]                               |                  |
|                                             | 2003            | 1.004                               | (0.734 to 1.374) |
|                                             | 2004            | 1.205                               | (0.908 to 1.599) |
|                                             | 2005            | 0.892                               | (0.664 to 1.197) |
|                                             | 2006            | 1.005                               | (0.753 to 1.341) |
|                                             | 2007            | 0.942                               | (0.714 to 1.242) |
|                                             | 2008            | 0.722                               | (0.543 to 0.961) |
|                                             | 2009            | 0.728                               | (0.532 to 0.995) |
|                                             | 2010            | 0.774                               | (0.561 to 1.067) |
|                                             | 2011            | 0.643                               | (0.472 to 0.876) |
|                                             | 2012            | 0.555                               | (0.403 to 0.765) |
|                                             | 2013            | 0.596                               | (0.434 to 0.819) |
|                                             | 2014            | 0.551                               | (0.395 to 0.769) |
|                                             | 2015            | 0.809                               | (0.576 to 1.137) |
|                                             | 2016            | 0.938                               | (0.664 to 1.325) |
|                                             | 2017            | 0.54                                | (0.338 to 0.865) |
|                                             | 2018            | 0.697                               | (0.368 to 1.318) |
|                                             | 2019            | 0.596                               | (0.282 to 1.262) |
